# Supplementary material for: AGIA Tag System Based on a High Affinity Rabbit Monoclonal Antibody against Human Dopamine Receptor D1 for Protein Analysis
Source: PLoS One. 2016 Jun 6;11(6):e0156716. doi: 10.1371/journal.pone.0156716 (PMC4894603; doi:10.1371/journal.pone.0156716)
Supplement: S1 Table — (XLSX) [file pone.0156716.s001.xlsx]

## Sheet: Sheet1
S1 Table. List of plasmids and primers
Plasmids
Plasmid No.	Construct	Note
Vector 1	pcDNA3.1/nAGIA-DEST	N-terminus AGIA tag expression vector
Vector 2	pcDNA3.2/AGIA-DEST	C-terminus AGIA tag expression vector
Vector 3	pcDNA3.1/nFLAG-DEST	N-terminus FLAG tag expression vector
Vector 4	pcDNA3.2/FLAG-DEST	C-terminus FLAG tag expression vector
Vector 5	pEU-E01-AGIA-GW	N-terminus AGIA tag pEU vector
Vector 6	pEU-E01-GW-AGIA	C-terminus AGIA tag pEU vector
Vector 7	pEU-E01-GW-AGIA/E2D	C-terminus AGIA/E2D tag pEU vector
Vector 8	pDONR221-DRD1	Gateway entry clone (Takeda et al. 2015)
Vector 9	pcDNA3.2-DRD1-FLAG	Overexpression of DRD1-FLAG in mammalian cultured cells
Vector 10	pEU-E01-bls-SrtA-DRD1 (337-447)	Cell-free expression of biotin-SrtA-DRD1 (337-447 )(Takeda et al. 2015)
Vector 11	pEU-E01-bls-SrtA-DRD1 (337-376)	Cell-free expression of biotin-SrtA-DRD1 (337-376)
Vector 12	pEU-E01-bls-SrtA-DRD1 (374-413)	Cell-free expression of biotin-SrtA-DRD1 (374-413)
Vector 13	pEU-E01-bls-SrtA-DRD1 (411-447)	Cell-free expression of biotin-SrtA-DRD1 (411-447)
Vector 14	pEU-E01-FLAG-GST-DRD1_Cterminus2_∆1	Cell-free expression of FLAG-GST-DRD1_Cterminus2_∆1 protein
Vector 15	pEU-E01-FLAG-GST-DRD1_Cterminus2_∆2	Cell-free expression of FLAG-GST-DRD1_Cterminus2_∆2 protein
Vector 16	pEU-E01-FLAG-GST-DRD1_Cterminus2_∆3	Cell-free expression of FLAG-GST-DRD1_Cterminus2_∆3 protein
Vector 17	pEU-E01-FLAG-GST-DRD1_Cterminus2_∆4	Cell-free expression of FLAG-GST-DRD1_Cterminus2_∆4 protein
Vector 18	pEU-E01-FLAG-GST-DRD1_Cterminus2_∆3.1	Cell-free expression of FLAG-GST-DRD1_Cterminus2_∆3.1 protein
Vector 19	pEU-E01-FLAG-GST-DRD1_Cterminus2_∆3.2	Cell-free expression of FLAG-GST-DRD1_Cterminus2_∆3.2 protein
Vector 20	pEU-E01-FLAG-GST-DRD1_Cterminus2_∆3.0.1	Cell-free expression of FLAG-GST-DRD1_Cterminus2_∆3.0.1 protein
Vector 21	pEU-E01-FLAG-GST-DRD1_Cterminus2_∆3.0.2	Cell-free expression of FLAG-GST-DRD1_Cterminus2_∆3.0.2 protein
Vector 22	pEU-E01-FLAG-GW	N-terminus FLAG tag pEU vector
Vector 23	pEU-E01-GW-FLAG	C-terminus FLAG tag pEU vector
Vector 24	pDONR221-Venus	Gateway entry clone
Vector 25	pDONR221-Mdm2	Gateway entry clone
Vector 26	pDONR221-p53	Gateway entry clone
Vector 27	pDONR221-GATA3	Gateway entry clone
Vector 28	pDONR221-RelA	Gateway entry clone
Vector 29	pDONR221-MIB2	Gateway entry clone
Vector 30	pDONR221-MARCH8	Gateway entry clone
Vector 31	pDONR221-AtGID1A	Gateway entry clone
Vector 32	pDONR221-AtUBQ10	Gateway entry clone
Vector 33	pEU-E01-AGIA-Venus	Cell-free expression of AGIA-Venus protein
Vector 34	pEU-E01-Venus-AGIA	Cell-free expression of Venus-AGIA protein
Vector 35	pEU-E01-FLAG-Venus	Cell-free expression of FLAG-Venus protein
Vector 36	pEU-E01-Venus-FLAG	Cell-free expression of Venus-FLAG protein
Vector 37	pEU-E01-bls-Mdm2	Cell-free expression of biotin-Mdm2 protein
Vector 38	pEU-E01-AGIA-p53	Cell-free expression of AGIA-p53 protein
Vector 39	pEU-E01-AGIA-GATA3	Cell-free expression of AGIA-pGATA3 protein
Vector 40	pcDNA3.2-Venus-AGIA	Overexpression of Venus-AGIA in mammalian cultured cells
Vector 41	pcDNA3.1-AGIA-RelA	Overexpression of AGIA-RelA in mammalian cultured cells
Vector 42	pcDNA3.2-MIB2-AGIA	Overexpression of MIB2-AGIA in mammalian cultured cells
Vector 43	pcDNA3.2-MARCH8-AGIA	Overexpression of MARCH8-AGIA in mammalian cultured cells
Vector 44	p35SΩ-GW-NOST	Plant expression vector (Nemoto et al. 2015)
Vector 45	p35SΩ-AtGID1A-AGIA	Overexpression of AtGID1A-AGIA in Arabidopsis
Vector 46	p35SΩ-AGIA-AtUBQ10	Overexpression of AGIA-AtUBQ10 in Arabidopsis
Vector 47	pEU-E01-FLAG-GST-AGIA/E1D	Cell-free expression of FLAG-GST-AGIA/E1D
Vector 48	pEU-E01-FLAG-GST-AGIA/E2D	Cell-free expression of FLAG-GST-AGIA/E2D
Vector 49	pEU-E01-FLAG-GST-AGIA/P9V	Cell-free expression of FLAG-GST-AGIA/P9V
Vector 50	pEU-E01-Venus-AGIA/E2D	Cell-free expression of Venus-AGIA/E2D
Vector 51	pEU-E01-RelA-AGIA/E2D	Cell-free expression of RelA-AGIA/E2D
Vector 52	pDONR221-OCT4	Gateway entry clone
Vector 53	pEU-E01-OCT4-AGIA/E2D	Cell-free expression of OCT4-AGIA/E2D
Primers
Primer No.	Sequence	Purpose
Primer 1	CAGCTGGTATTGCTCGCCCATTGGAAAACCTGTATTTTCAGGGC	Construction of Vector 1
Primer 2	CGAGCAATACCAGCTGCTTCTTCCATGGTAAGCTTAACTAGCCAG	Construction of Vector 1
Primer 3	CAGCTGGTATTGCTCGCCCATTGCTCGATTCTACGCGTACCGG	Construction of Vector 2
Primer 4	CGAGCAATACCAGCTGCTTCTTCTTCGAACCGCGGGCCCTC	Construction of Vector 2
Primer 5	ATAAAGATGATGACGATAAAGAAAACCTGTATTTTCAGGGCCC	Construction of Vector 3
Primer 6	TCGTCATCATCTTTATAATCCATGGTAAGCTTAACTAGCCAG	Construction of Vector 3
Primer 7	ATAAAGATGATGACGATAAACTCGATTCTACGCGTACCGG	Construction of Vector 4
Primer 8	TCGTCATCATCTTTATAATCTTCGAACCGCGGGCCCTC	Construction of Vector 4
Primer 9	CAGCTGGTATTGCTCGCCCATTGACAAGTTTGTACAAAAAAGCTGA	Construction of Vector 5
Primer 10	CGAGCAATACCAGCTGCTTCTTCCATGATATCTTGGTGATGTAGATAGGT	Construction of Vector 5
Primer 11	CAGCTGGTATTGCTCGCCCATTGTAGCTAGCTAGATATCACTAGT	Construction of Vector 6
Primer 12	CGAGCAATACCAGCTGCTTCTTCCACCACTTTGTACAAGAAAGC	Construction of Vector 6
Primer 13	GTGGAAGACGCAGCTGGTATTGCTCGC	Construction of Vector 7
Primer 14	AGCTGCGTCTTCCACCACTTTGTACAAGAAAG	Construction of Vector 7
Primer 15	GGGGACAAGTTTGTACAAAAAAGCAGGCTTCTTTCGGAAGGCATTTTCAACCC	Construction of Vector 11
Primer 16	GGGGACCACTTTGTACAAGAAAGCTGGGTCTCACTCATGATGGCTGGAAAACATC	Construction of Vector 11
Primer 17	GGGGACAAGTTTGTACAAAAAAGCAGGCTTCCATCATGAGCCACGAGGCT	Construction of Vector 12
Primer 18	GGGGACCACTTTGTACAAGAAAGCTGGGTCTCACAAGGGTCTGGCGATGCC	Construction of Vector 12
Primer 19	GGGGACAAGTTTGTACAAAAAAGCAGGCTTCAGACCCTTGGAGAAGCTGTC	Construction of Vector 13
Primer 20	GGGGACCACTTTGTACAAGAAAGCTGGGTCTCAGGTTGGGTGCTGACCG	Construction of Vector 13
Primer 21	CAGGCTTCTCTGAGGACCTGAAAAAG	Construction of Vector 14
Primer 22	TCCTCAGAGAAGCCTGCTTTTTTGTA	Construction of Vector 14
Primer 23	CAGGCTTCCTGAAAAAGGAGGAGGCA	Construction of Vector 15
Primer 24	CCTTTTTCAGGAAGCCTGCTTTTTTGTA	Construction of Vector 15
Primer 25	CAGGCTTCGAGGAGGCAGCTGGCATC	Construction of Vector 16
Primer 26	GCCTCCTCGAAGCCTGCTTTTTTGTA	Construction of Vector 16
Primer 27	AGGCTTCGCTGGCATCGCCAGACC	Construction of Vector 17
Primer 28	ATGCCAGCGAAGCCTGCTTTTTTGTA	Construction of Vector 17
Primer 29	CAGGCTTCGAGGCAGCTGGCATCGCC	Construction of Vector 18
Primer 30	GCTGCCTCGAAGCCTGCTTTTTTGTA	Construction of Vector 18
Primer 31	CAGGCTTCGCAGCTGGCATCGCCAGA	Construction of Vector 19
Primer 32	CCAGCTGCGAAGCCTGCTTTTTTGTA	Construction of Vector 19
Primer 33	CCAGACCCTGAGACCCAGCTTTCTTG	Construction of Vector 20
Primer 34	GGGTCTCAGGGTCTGGCGATGCCAGC	Construction of Vector 20
Primer 35	TCGCCAGATGAGACCCAGCTTTCTTG	Construction of Vector 21
Primer 36	GGGTCTCATCTGGCGATGCCAGCTGC	Construction of Vector 21
Primer 37	ATGGATTACAAGGATGACGACGATAAGACAAGTTTGTACAAAAAAGCTGA	Construction of Vector 22
Primer 38	TGTCTTATCGTCGTCATCCTTGTAATCCATGATATCTTGGTGATGTAGAT	Construction of Vector 22
Primer 39	GTGGATTACAAGGATGACGACGATAAGTAGCTAGCTAGATATCACTAGTT	Construction of Vector 23
Primer 40	CTACTTATCGTCGTCATCCTTGTAATCCACCACTTTGTACAAGAAAGCTG	Construction of Vector 23
Primer 41	GGCTTCGACGAGGCAGCTGGCATCGCC	Construction of Vector 47
Primer 42	TGCCTCGTCGAAGCCTGCTTTTTTGTAC	Construction of Vector 47
Primer 43	TTCGAGGACGCAGCTGGCATCGCCAGAC	Construction of Vector 48
Primer 44	AGCTGCGTCCTCGAAGCCTGCTTTTTTG	Construction of Vector 48
Primer 45	GCCAGAGTATTGTGAGACCCAGCTTTC	Construction of Vector 49
Primer 46	TCACAATACTCTGGCGATGCCAGCTGC	Construction of Vector 49
Primer 47	TCAGCTCCGACCCAGCTTTCTTGTAC	Construction of Vector 51
Primer 48	GCTGGGTCGGAGCTGATCTGACTCAG	Construction of Vector 51
